# Supplementary material
Source: ML conference proceedings conference paper supplement (https://proceedings.mlr.press/v139/jha21a.html)
Supplement: Supplementary file 1 [file jha21a-supp.pdf]

## A. Channel Scaling Vs. Feature map Scaling

For extremely lower ReLU budgets, we use a combination of channel scaling and fmaps’ resolution scaling. Since reducing fmaps’ resolution (each spatial dimensions of fmaps) by  $2\times$  ( $\rho=0.5$ ) decreases the ReLU count by  $4\times$ , we first use channel scaling ( $\alpha = 0.5$ ) for reducing the ReLU count by  $2\times$ . Further, for  $4\times$  reduction in ReLU count, we prefer to use fmaps’ resolution scaling ( $\rho=0.5$ ) over channel scaling ( $\alpha=0.25$ ) since the former results in more accurate networks, as illustrated in Table 9. Unlike fmap resolution scaling, channel scaling reduces the parameter count along with the ReLU count, which may reduce the expressive power of a network. Hence, the network is more accurate with fmaps’ resolution scaling.

Table 9. Performance comparison for ReLU optimization using channel scaling ( $\alpha < 1$ ) and fmap-resolution scaling ( $\rho < 1$ ). Baseline models have  $\alpha=1$  and  $\rho=1$ . At iso-ReLU, accuracy (w/ KD) of the the fmap-resolution scaled models is higher than the channel scaled models.

| Network                         | #Conv | #ReLUs | CIFAR-100  |           |
|---------------------------------|-------|--------|------------|-----------|
|                                 |       |        | W/o KD (%) | W/ KD (%) |
| ResNet18 (baseline)             | 17    | 557K   | 74.46      | 76.94     |
| ResNet18; $\alpha=0.25, \rho=1$ | 17    | 139K   | 68.17      | 70.19     |
| ResNet18; $\alpha=1, \rho=0.5$  | 17    | 139K   | 68.47      | 72.72     |
| ResNet10 (baseline)             | 9     | 311K   | 74.10      | 76.69     |
| ResNet10; $\alpha=0.25, \rho=1$ | 9     | 78K    | 66.69      | 66.88     |
| ResNet10; $\alpha=1, \rho=0.5$  | 9     | 78K    | 66.67      | 71.86     |
| ResNet6 (baseline)              | 5     | 188K   | 68.86      | 69.58     |
| ResNet6; $\alpha=0.25, \rho=1$  | 5     | 47K    | 57.64      | 56.9      |
| ResNet6; $\alpha=1, \rho=0.5$   | 5     | 47K    | 64.74      | 68.09     |

## B. VGGNet DeepReDuce Pareto Points

We do not remove ReLUs from fully connected (FC) layers as FC account only 8.192K ReLUs and training networks without FC ReLUs is challenging. The results are shown in Table 10. Unlike ResNets and MobileNets, ReLUs in  $S_5$  are least critical and that of the  $S_1$  is moderate.

Table 10. Stage-wise ReLUs’ criticality in VGG16 evaluated on CIFAR-10.  $S_5$  is least critical while  $S_2$  and  $S_3$  are most critical.

| Net                     | #ReLUs | W/o KD (%) | W/ KD (%) | $C_k$ |
|-------------------------|--------|------------|-----------|-------|
| $S_1 + \text{FC-ReLUs}$ | 139.3K | 82.0       | 81.4      | 10.90 |
| $S_2 + \text{FC-ReLUs}$ | 73.7K  | 86.1       | 85.3      | 14.31 |
| $S_3 + \text{FC-ReLUs}$ | 57.3K  | 86.4       | 85.1      | 14.40 |
| $S_4 + \text{FC-ReLUs}$ | 32.8K  | 77.1       | 77.7      | 9.17  |
| $S_5 + \text{FC-ReLUs}$ | 14.3K  | 63.9       | 66.0      | 0.00  |

The ReLU optimizations step for the Pareto points in Figure 5 are listed in Table 11. Models are the ReLU-optimized versions (Thinned and Reshaped) of two Culled networks: (1) stages  $S_4$  and  $S_5$  are Culled and (2) stages  $S_1, S_4$  and  $S_5$  are Culled.

Table 11. Optimization steps for MobileNetV1 DeepReDuce models shown in Figure 5

| Optimization Steps                                       | #ReLUs  | Acc.(%) |
|----------------------------------------------------------|---------|---------|
| $S_1 + S_2 + S_3 + \text{FC}$                            | 253.95K | 93.92   |
| $S_2 + S_3 + \text{FC}$                                  | 122.88K | 92.52   |
| $S_2^{RT} + S_3^{RT} + \text{FC}$                        | 73.73K  | 90.23   |
| $S_1^{RT} + S_2^{RT} + S_3^{RT} + \text{FC}, \alpha=0.5$ | 69.63K  | 89.97   |
| $S_2^{RT} + S_3^{RT} + \text{FC}, \alpha=0.5$            | 36.86K  | 88.92   |

## C. ReLUs’ Criticality and Pareto Points for MobileNets

We evaluate the ReLUs’ criticality in MobileNetV1 (Howard et al., 2017) and MobileNetV2 (Sandler et al., 2018)) on the CIFAR-100. The results are shown in Table 12. We observed the similar trend as ResNet18 and ResNet34 on CIFAR-100/TinyImageNet (shown in Tables 1 and 3), accuracy differs significantly across stages and  $S_1$  ( $S_4$ ) ReLUs are least (most) critical.

Table 12. Stage-wise criticality of ReLUs in MobileNetV1 and MobileNetV2 evaluated on CIFAR-100. FR is baseline with Full-ReLU ( $S_1+S_2+S_3+S_4+S_5$ ). ReLUs in  $S_1$  ( $S_4$ ) are least (most) critical.

| Net   | MobileNetV1 |           |          |       | MobileNetV2 |           |          |       |
|-------|-------------|-----------|----------|-------|-------------|-----------|----------|-------|
|       | #ReLUs      | W/o KD(%) | W/ KD(%) | $C_k$ | #ReLUs      | W/o KD(%) | W/ KD(%) | $C_k$ |
| FR    | 411.6K      | 67.58     | -        | -     | 425.6K      | 68.46     | -        | -     |
| $S_1$ | 131.1K      | 33.06     | 34.16    | 0.00  | 196.6K      | 37.82     | 34.25    | 0.00  |
| $S_2$ | 114.7K      | 49.64     | 50.65    | 11.83 | 110.6K      | 49.83     | 46.93    | 9.12  |
| $S_3$ | 57.3K       | 55.56     | 54.20    | 15.09 | 58.4K       | 54.74     | 53.06    | 14.15 |
| $S_4$ | 94.2K       | 57.37     | 61.10    | 19.60 | 27.6K       | 57.08     | 57.28    | 18.26 |
| $S_5$ | 14.3K       | 42.32     | 45.45    | 9.37  | 32.4K       | 48.42     | 50.49    | 12.73 |

The Pareto points of DeepReDuce models for MobileNetV1 (CIFAR-100) are shown in Figure 6. The optimization steps for all DeepReDuce models are list in the Table 13.

First, in step 1 of DeepReDuce (Figure 4), we Culled the least critical stage  $S_1$ . In step 2 of ReLU Thinning, we had two ways to remove the ReLUs from alternate layers, either from  $3 \times 3$  depthwise convolution layer or  $1 \times 1$  pointwise convolution layer. When downsampling is performed in  $3 \times 3$  depthwise convolution layer, the ReLU count of both the layers are not equal. More precisely, #ReLUs in the  $1 \times 1$  pointwise convolution is twice as that in the preceding  $3 \times 3$  depthwise conv.

We empirically found that removing ReLUs from  $3 \times 3$  depthwise conv layer yields more accurate iso-ReLU models. We suspect this is because  $3 \times 3$  depthwise convolutions perform filtering (feature learning) and  $1 \times 1$  pointwise convolutions perform feature aggregation (Howard et al., 2017), the ReLUs in the former layer is more critical for accuracy.

Table 13. Optimization steps for MobileNetV1 DeepReDuce models shown in Figure 6

| Optimization Steps                                                | #ReLU   | Acc.(%) |
|-------------------------------------------------------------------|---------|---------|
| $S_2 + S_3 + S_4 + S_5$                                           | 280.60K | 70.83   |
| $S_2^{RT} + S_3^{RT} + S_4^{RT} + S_5^{RT}$                       | 108.54K | 70.77   |
| $S_2^{RT} + S_3^{RT} + S_4^{RT} + S_5^{RT}, \alpha=0.5$           | 54.27K  | 67.46   |
| $S_2^{RT} + S_3^{RT} + S_4^{RT} + S_5^{RT}, \rho=0.5$             | 27.14K  | 62.96   |
| $S_2^{RT} + S_3^{RT} + S_4^{RT} + S_5^{RT}, \alpha=0.5, \rho=0.5$ | 13.57K  | 58.25   |

## D. ReLU Criticality in ResNet56

We examine the stage-wise criticality of ReLUs in ResNet56 and results are shown in Table 14.

Table 14. Stage-wise criticality of ReLUs in ResNet56 evaluated on CIFAR-100. S3 is most critical and S1 is least critical.

| Stages | #ReLU  | W/o KD (%) | W/ KD (%) | $C_k$ |
|--------|--------|------------|-----------|-------|
| S1     | 311.3K | 57.92      | 59.45     | 0.0   |
| S2     | 147.5K | 65.62      | 67.97     | 6.0   |
| S3     | 73.73K | 65.36      | 69.22     | 7.2   |

## E. Layer-wise Distribution of ReLUs

We show the layer-wise distribution of FLOPs, parameters, and ReLU count in the standard networks such as ResNet34 (He et al., 2016), VGG16 (Simonyan & Zisserman, 2014), MobileNetV1 (Howard et al., 2017), and MobileNetV2 (Sandler et al., 2018) in Figure 7. Consistent with ResNet18 (Figure 3), the FLOPs are evenly distributed, more parameters are used in deeper layers, and ReLUs are mostly in initial layers of the networks. Thus, the ReLU reduction in initial layers has a significantly greater impact on the overall ReLU count of these networks. Moreover, the stark difference between the ReLU distribution and FLOPs/parameter distribution indicates that ReLU optimization cannot be ensured through the popular FLOPs/parameters pruning techniques.

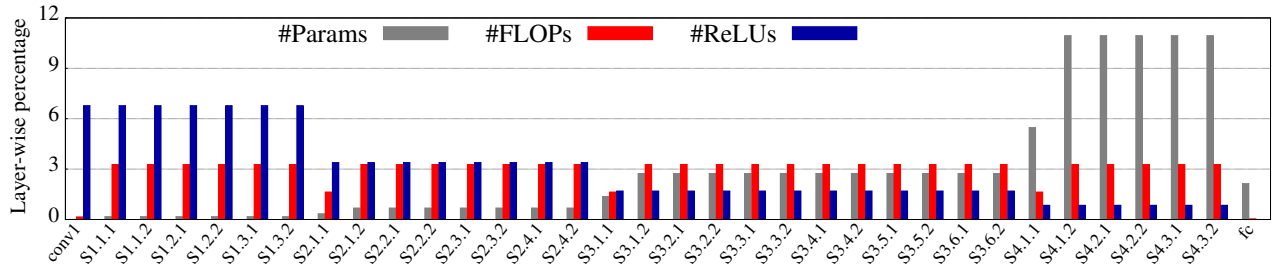

(a) Layer-wise distribution of parameter, FLOPs, and ReLU in ResNet34 (He et al., 2016).

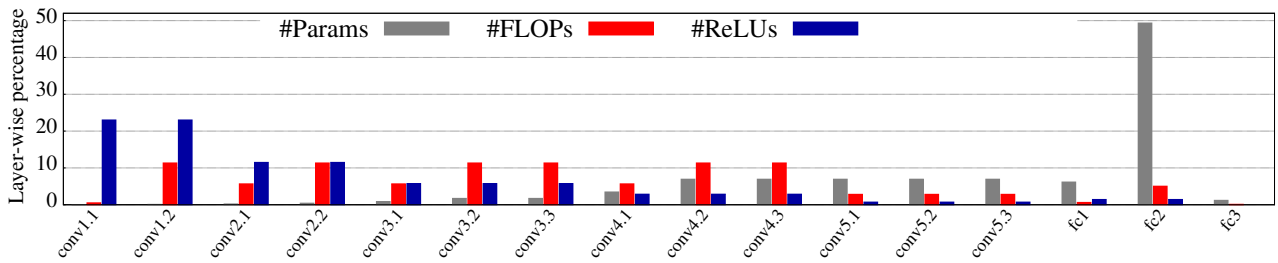

(b) Layer-wise distribution of parameter, FLOPs, and ReLU in VGG16 (Simonyan & Zisserman, 2014).

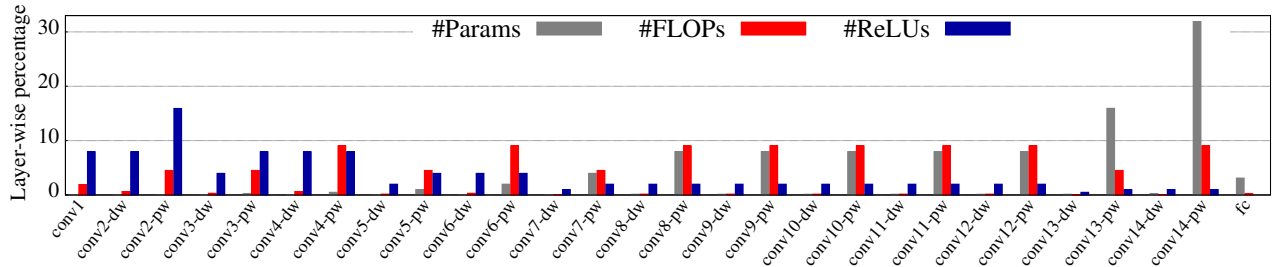

(c) Layer-wise distribution of parameter, FLOPs, and ReLU in MobileNetV1 (Howard et al., 2017).

Figure 7. Layer-wise percentage of parameter, FLOPs, and ReLU in various DNNs. FLOPs are evenly distributed, parameters (ReLU) are increases (decreases) from initial to deeper layers.
